# Supplementary material for: Polyhydroxycurcuminoids but not curcumin upregulate neprilysin and can be applied to the prevention of Alzheimer’s disease
Source: PubMed Central journal article supplement (PMC4942833; doi:10.1038/srep29760), 2016-07-13
Supplement: srep29760-s1.pdf [file srep29760-s1.pdf]

# Polyhydroxycurcuminoids but not curcumin upregulate neprilysin and can be applied to the prevention of Alzheimer's disease

Po-Ting Chen<sup>†‡</sup>, Zih-ten Chen<sup>‡</sup>, Wen-Chi Hou<sup>§</sup>, Lung-Chih Yu<sup>†</sup>, and Rita P.-Y.  
Chen<sup>†‡\*</sup>

<sup>†</sup> Institute of Biochemical Sciences, National Taiwan University, No. 1, Sec. 4,  
Roosevelt Rd., Taipei 106, Taiwan

<sup>‡</sup> Institute of Biological Chemistry, Academia Sinica, No. 128, Sec. 2, Academia Rd.,  
Nankang, Taipei 115, Taiwan

<sup>§</sup> Graduate Institute of Pharmacognosy, Taipei Medical University, No. 250, Wuxing  
St., Taipei 110, Taiwan

## Supplementary Information

**Table S1. Statistic analysis of DNA methylation in high CpG density region of the NEP promoter (site 23-34) by Fisher's exact test.**

|                           | Unmethylated<br>CpG | Methylated<br>CpG | Ratio of<br>CpG<br>methylation | <i>p</i> -value<br>(vs Control) | <i>p</i> -value<br>(vs Curcumin) |
|---------------------------|---------------------|-------------------|--------------------------------|---------------------------------|----------------------------------|
| <b>Control</b>            | 9                   | 111               | 92.50 %                        | -                               | 1.0000                           |
| <b>Curcumin</b>           | 10                  | 110               | 91.67 %                        | 1.0000                          | -                                |
| <b>Compound<br/>No. 7</b> | 19                  | 101               | 84.17 %                        | 0.0688                          | 0.1119                           |
| <b>Compound<br/>No. 8</b> | 13                  | 107               | 89.17 %                        | 0.5030                          | 0.6618                           |
